# Supplementary material
Source: MDPI journal article supplement (https://www.mdpi.com/1424-2818/14/9/757)

Hetaerina  
Mnesarete  
Ormenophlebia

Male, Hindwing, color:

hyaline (0)  
basal coloration (1)  
entire wing colored (2)  
missing data

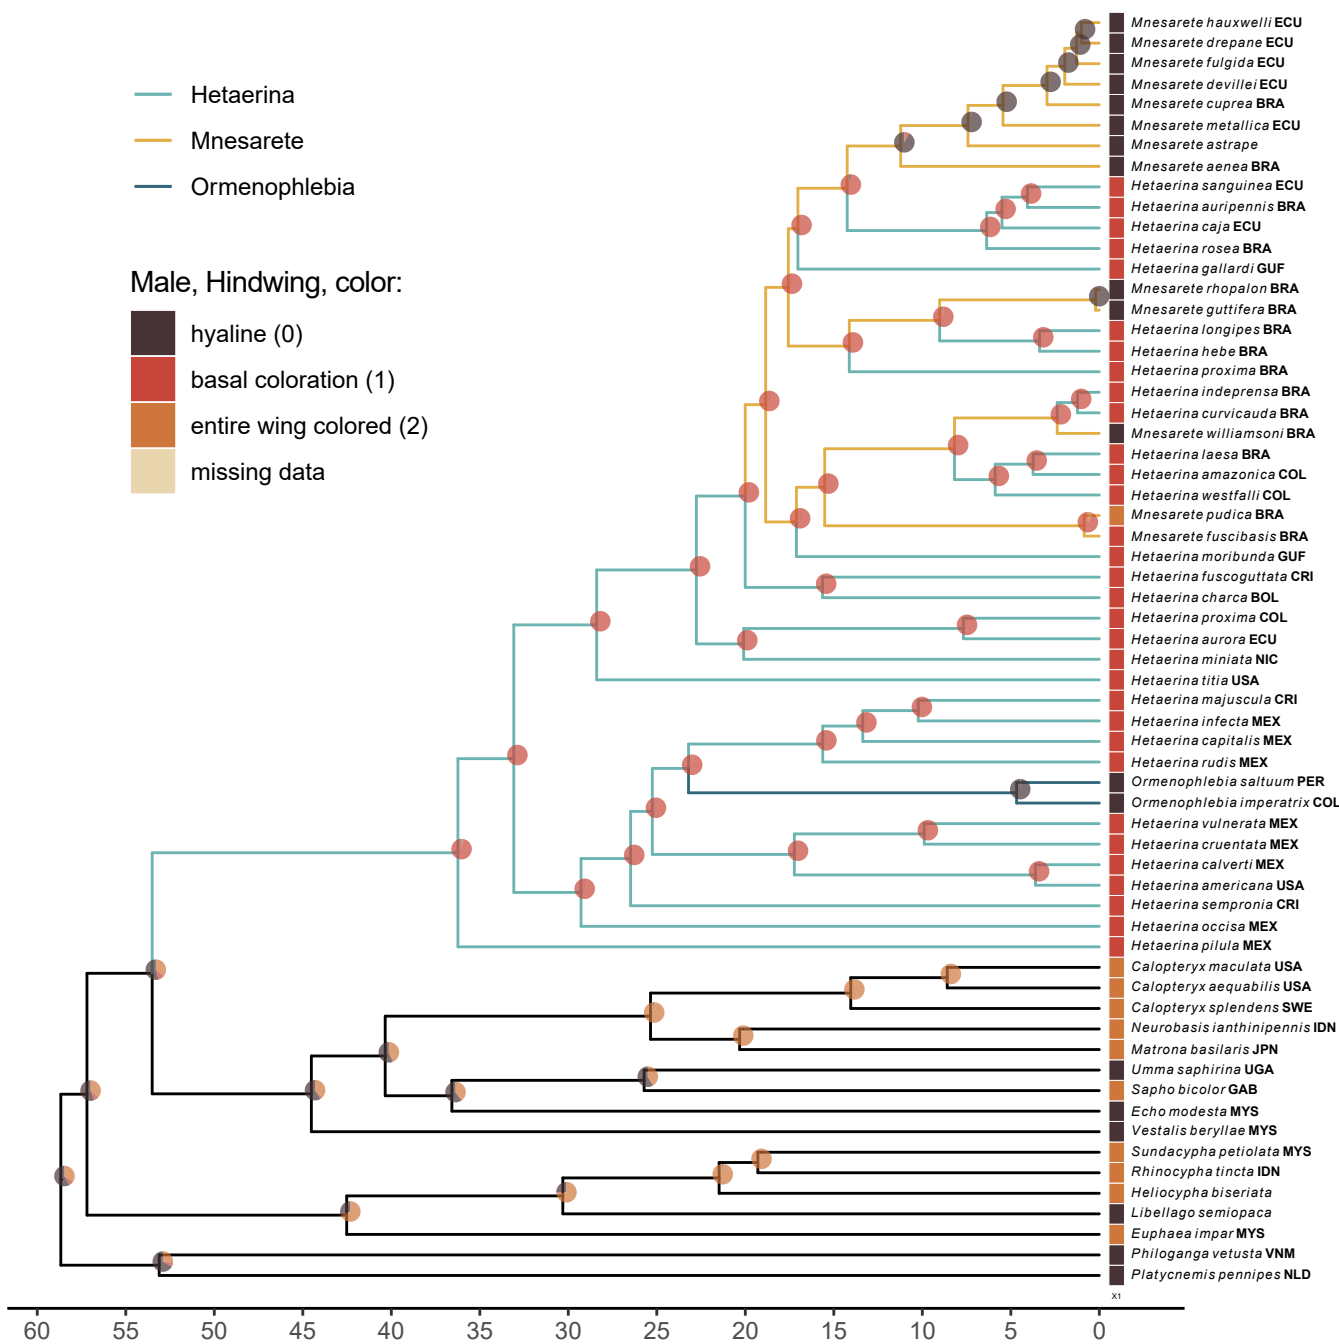

Supplement: s1 [file s1]
