# Supplementary material
Source: MDPI journal article supplement (https://www.mdpi.com/1424-2818/14/9/757)
Supplement: s1 [file s1]

Archive with 20 entries (18 files):
- File S1/
- File S1/abrupt-distance-matrix.txt
- File S1/area-matrix-updated.phy
- File S1/area-matrix.phy
- File S1/gradual-distance-matrix.txt
- File S1/time-period-abrupt.txt
- File S1/time-period-gradual.txt
- supplementary/
- supplementary/FigS1.pdf
- supplementary/FigS2.pdf
- supplementary/FigS3.pdf
- supplementary/FigS4.pdf
- supplementary/FigS5.pdf
- supplementary/FigS6.pdf
- supplementary/Supplementary Information.pdf
- supplementary/TableS2.xlsx
- supplementary/TableS3.xlsx
- supplementary/TableS4.xlsx
- supplementary/TableS5.xlsx
- supplementary/TableS6.xlsx
