# Supplementary material
Source: MDPI journal article supplement (https://www.mdpi.com/1424-2818/14/9/757)
Supplement: s1 [file s1 › File S1/abrupt-distance-matrix.txt]

A       B       C       D       E       F       G       H       I       J
1       1       1       0.5     0.4     0.4     0.2     0       0       0
1       1       1       0.8     0.6     0.6     0.4     0.2     0.2     0.2
1       1       1       1       0.8     0.8     0.6     0.4     0.4     0.4
0.5     0.8     1       1       1       1       0.8     0.6     0.6     0.8
0.4     0.6     0.8     1       1       1       1       0.8     0.8     0.8
0.4     0.6     0.8     1       1       1       1       1       1       1
0.2     0.4     0.6     0.8     1       1       1       1       1       0.8
0       0.2     0.4     0.6     0.8     1       1       1       1       1
0       0.2     0.4     0.6     0.8     1       1       1       1       0.8
0       0.2     0.4     0.8     0.8     1       0.8     1       0.8     1


A       B       C       D       E       F       G       H       I       J
1       1       1       0       0       0       0       0       0       0
1       1       1       0       0       0       0       0       0       0
1       1       1       0       0       0       0       0       0       0
0       0       0       1       1       1       0.8     0.6     0.6     0.8
0       0       0       1       1       1       1       0.8     0.8     0.8
0       0       0       1       1       1       1       1       1       1
0       0       0       0.8     1       1       1       1       1       0.8
0       0       0       0.6     0.8     1       1       1       1       1
0       0       0       0.6     0.8     1       1       1       1       0.8
0       0       0       0.8     0.8     1       0.8     1       0.8     1
