# Supplementary material
Source: MDPI journal article supplement (https://www.mdpi.com/1424-2818/14/9/757)
Supplement: s1 [file s1 › File S1/area-matrix-updated.phy]

46	10	(A B C D E F G H I J)
H_ama5	0000110000
H_am2	1110000000
H_amNR2	1110000000
H_auriBr3	0000011100
H_aurEc1	0001000000
H_caj2	0001100010
H_cap802	0111000000
H_char5	0000110000
H_cru33	0111000000
H_curBr2	0000010100
H_fus56	0001000000
H_gal2	0000100000
H_heb2	0000001010
H_indBr1	0000101000
H_infCh1	0110000000
H_lae	0000111000
H_lon2	0000001110
H_maj53	0001000000
H_min36	0011000000
H_mor4	0000111000
H_oc41	0111000001
H_pil32	0010000000
H_pro2	0001000000
H_ros7	0000010111
H_rudCh1	0100000000
H_san	0001111000
H_sem2	0011000000
H_tit35	1111000000
H_vul041	100000000
H_wes2	0000111000
H_pro3	0000000010
M_aen4	0000110000
M_ast6	0000100000
M_cup6	0000110000
M_dev2	0000000001
M_dre3	0000000001
M_ful4	0000100001
M_fusc	0000011000
M_gut4	0000000110
M_hau2	0000100001
M_met2	0000100001
M_pud	0000011110
M_rho	0000000010
M_wil3	0000100000
O_imp2	0000000001
O_sal	0000000001
