# Supplementary material
Source: MDPI journal article supplement (https://www.mdpi.com/1424-2818/14/9/757)
Supplement: s1 [file s1 › supplementary/TableS2.xlsx]

## Sheet: Sheet1
Family	Genus	Species	Country	Name in analysis	COI 5' end	COI 3' end	12S	ef1a	ITS1/ITS2	Collected from GenBank	Determination	Collector	Locality	GPS	Collecting date	Old name
Calopterygidae	Calopteryx	aequabilis	USA	C_aeq		OP208160	OP222821	x	OP203933							cal
Calopterygidae	Calopteryx	aequabilis	USA	C_aeq2			OP222820				A.R. Myrup	A. R. Myrup	Utah, Box Elder Co., Raft River jct. Yost Flat Rd	41.96707, -113.66005	male	Cal_aequibalis
Chlorocyphidae	Chlorocypha	curta	CMR	C_curta					AJ746319.1				Cameroon
Calopterygidae	Calopteryx	maculata	USA	C_mac	OP208232	OP208159	OP222819	x					Louisiana	31.075803, -93.488817		cal30
Calopterygidae	Calopteryx	splendens	SWE	C_splend					KY275436.1				Sweden: Stockholm
Calopterygidae	Calopteryx	splendens	GRC	C_splend			EU477613						Greece
Euphaeidae	Euphaea	impar	MYS	E_impar					AJ746322.1				Malaysia: Sarawak
Euphaeidae	Euphaea	impar	MYS	E_impar	KF369388.1								Malaysia:Perak
Calopterygidae	Echo	modesta	MYS	E_modes					AJ458984.1				Malaysia: Terengganu
Calopterygidae	Echo	modesta	THA	E_modes	KF369378.1								Thailand:Kanchanaburi river
Calopterygidae	Echo	modesta		E_modes			EU055003.1
Calopterygidae	Hetaerina	americana	USA	H_am		OP208147	OP222935	x	OP203932		T. H. Ogden	T.H.Ogden	CA, Butte Co., Big Chico Creek at Upper Bidwell Park	39.770833, -121.783056		OD1203
Calopterygidae	Hetaerina	calverti	MEX	H_am14	OP208165	OP208144	OP222922	x	OP203925					19.45608611, -96.47929444		am14
Calopterygidae	Hetaerina	americana	USA	H_am19			OP222923		OP203924				Arizona	32.91626667, -109.4928167		am19
Calopterygidae	Hetaerina	americana	USA	H_am2	OP208164	OP208143	OP222925	x	OP203931		A. R. Myrup	A. R. Myrup	Utah, Grand Co., Moab Rotary Park Mill Creek	38.56504, -109.53737	male	OD1228
Calopterygidae	Hetaerina	americana	USA	H_am20			OP222924	x	OP203923				Arizona	32.91626667, -109.4928167		am20
Calopterygidae	Hetaerina	americana	USA	H_am3		OP208146	OP222936	x	OP203930		A. R. Myrup	A. R. Myrup	Utah, Tooele Co., Horseshoe springs, UT Hwy 196, 10 miles S of I-80	40.61401, -112.70823	male	OD1229
Calopterygidae	Hetaerina	americana	USA	H_am4	OP208161	OP208140	OP222927	x	OP203929		A. R. Myrup	A. R. Myrup	Utah, Washington Co., Lytle Ranch Preserve Beaver Dam Wash	37.14330, -114.02224		OD1230
Calopterygidae	Hetaerina	americana	USA	H_am5	OP208162	OP208141	OP222928	x	OP203928		A. R. Myrup	A. R. Myrup	Utah, Carbon Co., Grassy Trail Creek SE Wellington, Mount Rd	39.47623, -110.56846	male	OD1231
Calopterygidae	Hetaerina	americana	USA	H_am6	OP208163	OP208142	OP222930	x	OP203927		A. R. Myrup	A. R. Myrup	Utah, Utah County, Goshen Res. (US 6)	39.95222, -111.93339		OD1232
Calopterygidae	Hetaerina	americana	USA	H_am7		OP208145	OP222929	x	OP203926		A. R. Myrup	A. R. Myrup	Utah, Juab Co., Current Cr. Goshen Cyn Road	39.88822, -111.88702		OD1233
Calopterygidae	Hetaerina	amazonica	PER	H_ama4			OP222865				R. A. Clement	Svenson, Miller, Osborne, Ogden	Rio Tambopata, Explorer's inn-Rio Tower	S 12°50.208' W 69°17.603		OD1214
Calopterygidae	Hetaerina	amazonica	COL	H_ama5		OP208089	OP222864					M. Sanchez Herrera and E. Realpe	Vaupes, Mitu, Rio Caño Sangre		MIT 134, from Melissa Sanchez	OD1255
Calopterygidae	Hetaerina	americana	MEX	H_amCm5					MH090390		Y. M. Vega-Sánchez	Sergio Camacho	Comitancillo, Oaxaca.	16.490491, -95.167071		Hetaerina_americana_Cm5_Mexico
Calopterygidae	Hetaerina	americana	USA	H_amLC3	MH090544		OP222931	x	MH090398				Colorado	40.557465, -105.019276		Hetaerina_americana_LC3_USA
Calopterygidae	Hetaerina	calverti	MEX	H_amNR2	MH090574		OP222926	x	MH090433		Y. M. Vega-Sánchez	Y. M. Vega-Sánchez	Nuevo Recuerdo, Chiapas.	15.90103, -91.99499		Hetaerina_americana_NR2_Mexico
Calopterygidae	Hetaerina	calverti	GTM	H_amSG1	MH090610		OP222932		MH090451		Y. M. Vega-Sánchez	Y. M. Vega-Sánchez	Río Negro, Sacapulas.	15.290081, -91.089086		Hetaerina_americana_SG1_Guatemala
Calopterygidae	Hetaerina	americana	MEX	H_amVe2				x	MH090406		Y. M. Vega-Sánchez	Y. M. Vega-Sánchez	Apazapan, Veracruz.	19.327447, -96.721044		Hetaerina_americana_Ve2_Mexico
Calopterygidae	Hetaerina	calverti	MEX	H_amVe6			OP222933	x	MH090410		Y. M. Vega-Sánchez	Y. M. Vega-Sánchez	Apazapan, Veracruz.	19.327447, -96.721044		Hetaerina_americana_Ve6_Mexico
Calopterygidae	Hetaerina	calverti	MEX	H_amZa1	MH090660		OP222934	x	MH090390		Y. M. Vega-Sánchez	Y. M. Vega-Sánchez	Zaragoza, Coahuila.	28.48658, -100.91071		Hetaerina_americana_Za1_Mexico
Calopterygidae	Hetaerina	aurora	ECU	H_aur			OP222841				F. C. Sibley	F. C. Sibley	Azuay Province, road to Cuenca, small side stream north side of road			OD942
Calopterygidae	Hetaerina	aurora	ECU	H_aur2			OP222840	x	OP203922		K. J. Tennessen	K. J. Tennessen	Bolivar Province, stream, waterfall 11km E of Caluma	-1.576389, -79.191944		OD943
Calopterygidae	Hetaerina	aurora	ECU	H_aurEc1	OP208219		OP222842	x	OP203921				Pichincha Province, Calacali-Nanegalito Road.	0.024833, -78.643		Hetaerina_aurora_Ec1_Ecuador
Calopterygidae	Hetaerina	auripennis	BRA	H_auri			OP222892	x	OP203920		Donnelly	Donnelly	Bahia, Serra Bonita Preserve and vicinity, Riberiao Braco do Sul, lowerpart	-15.4211, -39.5336		OD940
Calopterygidae	Hetaerina	auripennis	BRA	H_auri2			OP222909	x	OP203919		Donnelly	Donnelly	Bahia, Serra Bonita Preserve and vicinity, Riberiao Braco do Sul, lowerpart	-15.4211, -39.5336		OD941
Calopterygidae	Hetaerina	auripennis	BRA	H_auriBr2	OP208210		OP222894	x					Paragominas, Pará.			Hetaerina_auripenis_Br2_Brazil
Calopterygidae	Hetaerina	auripennis	BRA	H_auriBr3	OP208209		OP222895	x	OP203918				Paragominas, Pará.			Hetaerina_auripenis_Br3_Brazil
Chlorocyphidae	Heliocypha	biseriata		H_biser			EU054999
Calopterygidae	Hetaerina	caja caja	ECU	H_caj			OP222889		OP203917		S. Smith		Baeza, Hwy 45 km 87	-0.460455, -77.897723		OD1205
Calopterygidae	Hetaerina	caja caja	ECU	H_caj2		OP208076	OP222890	x	OP203916		S. Smith		Baeza, Hwy 45 km 87	-0.460455, -77.897723		OD1206
Calopterygidae	Hetaerina	caja caja	COL	H_caj4		OP208075	OP222899	x	OP203915			E. Realpe	Meta, Restrepo, Caño Seco			ER141012-1
Calopterygidae	Hetaerina	caja	CRI	H_caj54		OP208072	OP222897	MK243636	MK238645				Rio Palo Seco, Costa Rica	9.53508, -84.27901		caja54
Calopterygidae	Hetaerina	caja	CRI	H_caj55		OP208071	OP222898	MK243635	MK238644				Rio Desjarretado, Costa Rica	10.30183, -85.03687		caja55
Calopterygidae	Hetaerina	capitalis	MEX	H_cap17	OP208178	OP208122	OP222955		OP203914					18.65665, -95.15141667		cap17
Calopterygidae	Hetaerina	capitalis	MEX	H_cap44			OP222954		OP203913					18.367333, -94.965000		cap44
Calopterygidae	Hetaerina	capitalis	MEX	H_cap45			OP222953		OP203912					18.367333, -94.965000		cap45
Calopterygidae	Hetaerina	capitalis	MEX	H_cap802	OP208176	OP208123	OP222952	x	OP203911					21.366739, -104.616733		cap802
Calopterygidae	Hetaerina	capitalis	MEX	H_capAF5	OP208177		OP222957	x					Arroyo Frío, Tacambaro, Michoacán.	19.2130861, -96.97431667		Hetaerina_capitalis_AF5_Mexico
Calopterygidae	Hetaerina	capitalis	MEX	H_capCn1					OP203910				Las Cañadas, Huatusco del Chicuellar, Veracruz.	19.18529, -96.958844		Hetaerina_capitalis_Cn1_Mexico
Calopterygidae	Hetaerina	charca	ECU	H_char2			OP222843				K. J. Tennessen	K. J. Tennessen	Orellana Province, small stream nr. Reserva Rio Bigal, 30km N of Loreto	00 33'51"S 077 24'41"W		OD946
Calopterygidae	Hetaerina	charca	BOL	H_char4		OP208098	OP222844	x	OP203890		S. Smith	Svenson, Cameron, Bybee	Cochabamba, Route 7 between Cochabamba and Ville Tunari			OD1208
Calopterygidae	Hetaerina	charca	BOL	H_char5	OP208208	OP208099		x	OP203889		S. Smith	Svenson, Cameron, Bybee	Cochabamba, Route 7 between Cochabamba and Ville Tunari			OD1210
Calopterygidae	Hetaerina	charca	BOL	H_charBo1			OP222845	x	OP203888				Santa Cruz Dept., Florida Prov., Rio Achira, E of Samaipata.	-18.161667, -63.815		Hetaerina_chraca_Bo1_Bolivia
Calopterygidae	Hetaerina	cruentata	MEX	H_cru15	OP208194	OP208138	OP222944	x	OP203885					18.371000, -95.001483		cru15
Calopterygidae	Hetaerina	cruentata	MEX	H_cru16	OP208193	OP208137		x	OP203884					18.65665, -95.15141667		cru16
Calopterygidae	Hetaerina	cruentata	CRI	H_cru2	OP208197	OP208136	OP222941		OP203887		F. C. Sibley	FC Sibley	San Jose Province, km118 on Pan American Hwy, Bosque del Tolomuco	09 28.3N 83 41.8W		OD949
Calopterygidae	Hetaerina	cruentata	PAN	H_cru3	OP208196	OP208135	OP222942	x	OP203886		Donnelly	Donnelly	Chiriqui Provine, Mt. Totumas Lodge, ford at entrance	08.8726N 082.6904W		OD950
Calopterygidae	Hetaerina	cruentata	MEX	H_cru33	OP208195	OP208139	OP222945	x	OP203883					19.466793, -96.950183		cru33
Calopterygidae	Hetaerina	cruentata	CRI	H_cru60				MK243645	MK238636				Cacao Sector, Costa Rica	10.92329, -85.46551		cru60; H. cruentata 4
Calopterygidae	Hetaerina	cruentata	CRI	H_cru63				x					Quebrada Alondra, Costa Rica	10.28359, -84.79358		cru63; H. cruentata 5
Calopterygidae	Hetaerina	cruentata	MEX	H_cruAB0					OP203882				Agua Blanca, Jungapeo, Michoacán.	19.47321, -100.49128		Hetaerina_cruentata_AB0_Mexico
Calopterygidae	Hetaerina	cruentata	MEX	H_cruAF1			OP222943	x					Arroyo Frío, Tacambaro, Michoacán.	19.2130861, -96.97431667		Hetaerina_cruentata_AF1_Mexico
Calopterygidae	Hetaerina	curvicauda	BRA	H_curBr1	OP208227			x					Nova Nazaré, Mato Grosso.			Hetaerina_curvicauda_Br1_Brazil
Calopterygidae	Hetaerina	curvicauda	BRA	H_curBr2	OP208223		OP222853	x	OP203881				Nova Nazaré, Mato Grosso.			Hetaerina_curvicauda_Br2_Brazil
Calopterygidae	Hetaerina	curvicauda	BRA	H_curBr3	OP208230		OP222857		OP203880				Nova Nazaré, Mato Grosso.			Hetaerina_curvicauda_Br3_Brazil
Calopterygidae	Hetaerina	fuscoguttata	ECU	H_fus			OP222887	x	OP203879		W. Haber	D. Wagner, J. Miller, E. Tapia	Pichincha Province, Tinalandia, 16 km E Sto. Domingo de los Colorados, forested stream	-0.300722, -79.060778		OD1348
Calopterygidae	Hetaerina	fuscoguttata	CRI	H_fus56	OP208198	OP208113	OP222885	MK243638	MK238643				Rio Bonito, Costa Rica	8.70227, −83.21365		fus56
Calopterygidae	Hetaerina	fuscoguttata	CRI	H_fus57			OP222886	MK243637	OP203878				Quebrada Bonita, Costa Rica	9.77400, 284.60319		fus57
Calopterygidae	Hetaerina	gallardi	GUF	H_gal			OP222836	x	OP203877		F. C. Sibley	F. C. Sibley	Kaw Mountains, Rt. 6 17miles SE of Roura, Forest and streams around Patawa lodge	4.548667, -52.151833		OD952
Calopterygidae	Hetaerina	gallardi	GUF	H_gal2		OP208090	OP222837	x	OP203895		Donnelly	Donnelly	Kaw Mountains, Potawa Lodge	4.543300, -52.151900		OD953
Calopterygidae	Hetaerina	gallardi	SUR	H_galSu1					OP203894				Suriname			Hetaerina_gallardi_Su1_Surinam
Calopterygidae	Hetaerina	hebe	BRA	H_heb					OP203893		Donnelly	Donnelly	Bahia, Camacan, Serra Bonita Preserve	-15.3840, -39.5720		OD954
Calopterygidae	Hetaerina	hebe	BRA	H_heb2			OP222849	x	OP203892		R. Guillermo-Ferreira	R. Guillermo-Ferreira	São Paulo, São Carlos, Universidade Federal	-21.931191, -47.8739	2016-03-02	OD1414
Calopterygidae	Hetaerina	hebe	BRA	H_heb3			OP222850		OP203891		R. Guillermo-Ferreira	R. Guillermo-Ferreira	São Paulo, Ubatuba, Pirim Rio, site 24	-23.377476, -44.960788	2016-04-02	OD1429
Calopterygidae	Hetaerina	indeprensa	BRA	H_indBr1	OP208226							L. Juen	Belterra, Pará.			Hetaerina_indeprensa_Br1_Brazil
Calopterygidae	Hetaerina	indeprensa	BRA	H_indBr2			OP222858					L. Juen	Belterra, Pará.			Hetaerina_indeprensa_Br2_Brazil
Calopterygidae	Hetaerina	indeprensa	BRA	H_indBr4			OP222859					L. Juen	Belterra, Pará.			Hetaerina_indeprensa_Br4_Brazil
Calopterygidae	Hetaerina	infecta	MEX	H_infCh1					OP203909		Y. M. Vega-Sánchez	Y. M. Vega-Sánchez	Zona arqueológica de Palenque, Chiapas.	17.4819		Hetaerina_infecta_Ch1_Mexico
Calopterygidae	Hetaerina	infecta	MEX	H_infCh3			OP222956				Y. M. Vega-Sánchez	Y. M. Vega-Sánchez	Zona arqueológica de Palenque, Chiapas.	17.4819		Hetaerina_infecta_Ch3_Mexico
Calopterygidae	Hetaerina	laesa Hagen	BRA	H_lae	OP208220	OP208087	OP222867	x	OP203908		A. C. Rehn	Dihmar	Parà, Igarapè Açu			OD1200
Calopterygidae	Hetaerina	laesa	BRA	H_lae2	OP208221	OP208088	OP222866	x	OP203907		R. W. Garrison	S. Bybee, R. Guillermo-Ferreira, R. A. Clement, S. Smith	Parà, Belem, Agropalma	-2.521002, -48.855789	2017-06-14	OD1441
Calopterygidae	Hetaerina	laesa	SUR	H_laeSu1					OP203906				Suriname			Hetaerina_laesa_Su1_Surinam
Calopterygidae	Hetaerina	longipes	BRA	H_lon2	OP208213	OP208095	OP222848	x	OP203904		S. Smith, R. A. Clement	S. Smith, R. A. Clement	São Paulo, São Carlos, Ufscar water canal	-21.981191, -47.873994		OD1190
Calopterygidae	Hetaerina	longipes	BRA	H_lon4	OP208214	OP208097	OP222847	x	OP203903		R. Guillermo-Ferreira	R. Guillermo-Ferreira	São Paulo, São Carlos, Universidade Federal	-21.931191, -47.8739	2016-03-02	OD1413
Calopterygidae	Hetaerina	longipes	BRA	H_lon5	OP208212	OP208096	OP222846	x	OP203902		R. Guillermo-Ferreira	R. Guillermo-Ferreira	São Paulo, São Carlos, Universidade Federal	-21.931191, -47.8739		OD1428
Calopterygidae	Hetaerina	majuscula	CRI	H_maj	OP208171	OP208121	OP222921		OP203898		F. C. Sibley	F.C. Sibley	San José Province, km118 on Pan American Hwy, Bosque del Tolomuco	9.471667, -83.696667		OD957
Calopterygidae	Hetaerina	majuscula	PAN	H_maj2					OP203897		Donnelly	Donnelly	Chiriqui Provine, Mount Tortumas Cloud Forest Lodge	8.8835, -82.4513		OD958
Calopterygidae	Hetaerina	majuscula	CRI	H_maj3	OP208174	OP208120	OP222920		OP203905		S. Smith	Bybee, Lord & Martin	Prov Puntarenas, Monteverde, UGA EcoLodge, San Luis	10.28237, -84.79889		OD1215
Calopterygidae	Hetaerina	majuscula	CRI	H_maj51					MK238639				Rio San Luis	10.27801, -84.78628		maj51; H. majuscula 1
Calopterygidae	Hetaerina	majuscula	CRI	H_maj52	OP208173	OP208119	OP222919		MK238637				Rio San Luis	10.27801, -84.78628		maj52; H. majuscula 2
Calopterygidae	Hetaerina	majuscula	CRI	H_maj53	OP208172	OP208118	OP222918		MK238638				Quebrada Pedegral, Costa Rica	10.92609, -85.47166		maj53; H. majuscula 3
Calopterygidae	Hetaerina	miniata	CRI	H_min3	OP208202	OP208117	OP222834	x	OP203896		R. A. Clement	Bybee, Lord & Martin	Prov. Heredia, nr. Puerto Viejo, La Selva Biol. Station	10.430530, -84.006400		OD1209
Calopterygidae	Hetaerina	miniata	NIC	H_min36	OP208200	OP208115	OP222831	x	OP203876					10.989456, -84.334467		min36
Calopterygidae	Hetaerina	miniata	NIC	H_min37	OP208201	OP208116	OP222832	x	OP203875					10.989456, -84.334467		min37
Calopterygidae	Hetaerina	miniata	NIC	H_min38	OP208199	OP208114	OP222833	x	OP203874					10.989456, -84.334467		min38
Calopterygidae	Hetaerina	moribunda	GUF	H_mor2			OP222888	x			F. C. Sibley	F. C. Sibley	Amazone Nature Lodge, Kaw Mountains, RT. D6, 14miles SE of Roura	4.559333, -52.207167		OD961
Calopterygidae	Hetaerina	moribunda	GUF	H_mor3				x	OP203873		F. C. Sibley	F. C. Sibley	Kaw Mountains, 1.5miles SW of Amazone Lodge, RT. D6, 14miles SE of Roura	4.544333, -52.220333		OD962
Calopterygidae	Hetaerina	moribunda	GUF	H_mor4				x	OP203872		Donnelly	Donnelly	St-Laurent-du-Maroni, Moutochi	5.3304, -54.0646		OD963
Calopterygidae	Hetaerina	occisa	MEX	H_oc31	OP208168	OP208153	OP222958	x	OP203867					18.550101, -95.066714		oc31
Calopterygidae	Hetaerina	occisa	MEX	H_oc40		OP208157	OP222961	x	OP203866					18.358994, -95.000232		oc40
Calopterygidae	Hetaerina	occisa	MEX	H_oc41	OP208170	OP208156	OP222963	x	OP203865					18.358994, -95.000232		oc41
Calopterygidae	Hetaerina	occisa	COL	H_oc5		OP208158	OP222965		OP203871		B. Mauffray	K. J. Tennessen	Meta, Billavicencio Municipality, Villavicencia, ca 1.2km N on Carrera 30, Bosque Bavaria	4.1751, -73.6418		OD968
Calopterygidae	Hetaerina	occisa	CRI	H_oc59					MK238631				Quebrada Aserradero, Costa Rica	10.898356, -85.56385		oc59; H. occisa 5
Calopterygidae	Hetaerina	occisa	ECU	H_oc6			OP222966		OP203870		K. J. Tennessen	K. J. Tennessen	Pastaza Province, N of Puyo, stream 5.5km SE off Hwy. 45	-1.375833, -77.867222		OD969
Calopterygidae	Hetaerina	occisa	CRI	H_oc7	OP208167	OP208155	OP222962		OP203869		R. A. Clement	Bybee, Lord & Martin	Prov. Heredia, nr. Puerto Viejo, La Selva Biol. Station	10.43053, -84.0064		OD1211
Calopterygidae	Hetaerina	occisa	MEX	H_oc719	OP208166	OP208154	OP222964	x	OP203864					18.550101, -95.066714		oc719
Calopterygidae	Hetaerina	occisa	PER	H_oc8			OP222967		OP203868			C. Beatty	Tarapoto, Rio Pucayoco			MSH-HET-171
Calopterygidae	Hetaerina	occisa	MEX	H_ocMx1			OP222959				Y. M. Vega-Sánchez	Y. M. Vega-Sánchez	Siete Aguas, Veracruz	18.7671, -96.8437		Hetaerina_occisa_Mx1
Calopterygidae	Hetaerina	occisa	MEX	H_ocPa0					OP203863				Rio Chacamax, Palenque, Chiapas	17.482924, -91.974132		Hetaerina_occisa_Pa0_Mexico
Calopterygidae	Hetaerina	occisa	MEX	H_ocVe1	OP208169		OP222960		OP203862				Apazapan, Veracruz	19.327447, -96.721044		Hetaerina_occisa_Ve1_Mexico
Calopterygidae	Hetaerina	pilula	MEX	H_pil11				x	KM383804				Cuetzalapan	18.371, -95.001		pil11; H. pilula 1
Calopterygidae	Hetaerina	pilula	MEX	H_pil32	OP208182	OP208151	OP222828	x	KM383806				Laguna Escondida	18.592, -95.084		pil32; H. pilula 2
Calopterygidae	Hetaerina	pilula	MEX	H_pil33			OP222829	x	KM383807				Laguna Escondida	18.592, -95.084		pil33; H. pilula 3
Calopterygidae	Hetaerina	pilula	MEX	H_pil824	OP208183	OP208152	OP222830	x	KM383805				Balzapote	18.614, -95.073		pil824; H. pilula 4
Calopterygidae	Hetaerina	newsp	COL	H_pro			OP222838	x			previously id'd as proxima, now known to be new species	M. Sanchez Herrera and E. Realpe	Boyaca, Arcabuco, Boqueron del Rio Cane			MSH-RC-02
Calopterygidae	Hetaerina	newsp	COL	H_pro2			OP222839	x	OP203861		previously id'd as proxima, now known to be new species	M. Sanchez Herrera and E. Realpe	Boyaca, Arcabuco, Boqueron del Rio Cane			MSH-RC-01
Calopterygidae	Hetaerina	proxima	BRA	H_pro3			OP222851	x	OP203860		R. Guillermo-Ferreira	R. Guillermo-Ferreira	São Paulo, Ubatuba, Pirim Rio	-23.377476, -44.960788	2016-04-02	OD1416
Calopterygidae	Hetaerina	proxima	BRA	H_pro4			OP222852		OP203859		R. Guillermo-Ferreira	R. Guillermo-Ferreira	São Paulo, Ubatuba, Pirim Rio	-23.377476, -44.960788	2016-04-02	OD1431
Calopterygidae	Hetaerina	rosea	BRA	H_ros2			OP222893	x	OP203858		Donnelly	Donnelly	Bahia, Camacan, Serra Bonita Preserve and vicinity, Rio Panelao at Fza Vila Vitoria	-15.3786, -39.5421		OD977
Calopterygidae	Hetaerina	rosea	PRY	H_ros5		OP208078	OP222908	x	OP203857		S. Smith	K. Dittmar de la Cruz	Rio Paraguay, Pantanal Puerto Murtillos, close to Brazilian border			OD1207
Calopterygidae	Hetaerina	rosea	BRA	H_ros6		OP208077	OP222891	x	OP203856		R. Guillermo-Ferreira	R. Guillermo-Ferreira	São Paulo, São Carlos, Universidade Federal	-21.931191, -47.8739	2016-03-02	OD1415
Calopterygidae	Hetaerina	rosea	BRA	H_ros7	OP208211	OP208079	OP222906	x	OP203855		Barro QUALi		Canastra		26.v.17	OD1430
Calopterygidae	Hetaerina	rosea	BRA	H_rosBr1				x					Nova Nazaré, Mato Grosso.			Hetaerina_rosea_Br1_Brazil
Calopterygidae	Hetaerina	rosea	BRA	H_rosBr2			OP222907	x	OP203854				Nova Nazaré, Mato Grosso.			Hetaerina_rosea_Br2_Brazil
Calopterygidae	Hetaerina	rosea	BRA	H_rosBr3			OP222896	x					Nova Nazaré, Mato Grosso.			Hetaerina_rosea_Br3_Brazil
Calopterygidae	Hetaerina	rudis	MEX	H_rudCh1	OP208175		OP222916		OP203901		Y. M. Vega-Sánchez	Y. M. Vega-Sánchez	Arroyo Palo Gordo, Reserva de la Biósfera El Triunfo, Chiapas.	15.739428, -92.918178		Hetaerina_rudis_Ch1_Mexico
Calopterygidae	Hetaerina	rudis	MEX	H_rudCh2			OP222917		OP203853		Y. M. Vega-Sánchez	Y. M. Vega-Sánchez	Arroyo Palo Gordo, Reserva de la Biósfera El Triunfo, Chiapas.	15.739428, -92.918178		Hetaerina_rudis_Ch2_Mexico
Calopterygidae	Hetaerina	sanguinea	ECU	H_san		OP208080	OP222900	x	OP203852				Coca, PEER-COCA#5		2013-07-05	OD1244
Calopterygidae	Hetaerina	sanguinea	COL	H_san2		OP208074	OP222903	x	OP203851			E. Realpe	Meta, Restrepo, Caño Seco			ER141012-2
Calopterygidae	Hetaerina	sanguinea	ECU	H_san4		OP208073	OP222904	x	OP203850				MSH PEER 01			OD1261
Calopterygidae	Hetaerina	sempronia	MEX	H_sem10	OP208185	OP208126	OP222950	x	OP203847					18.592450, -95.083900		sem10
Calopterygidae	Hetaerina	sempronia	CRI	H_sem2	OP208184	OP208128	OP222946	x	OP203849		W. Haber	R. Vargas C.	Prov. Limon, Pocoro, 14 km WSW of Siquirres, Finca de Erick Berlin: Las Brisas	10.070101, -83.630505	21 August, 2006	OD1349
Calopterygidae	Hetaerina	sempronia	MEX	H_sem42	OP208187	OP208125	OP222951	x	OP203846					18.656650, -95.151417		sem42
Calopterygidae	Hetaerina	sempronia	MEX	H_sem43	OP208188	OP208127	OP222947	x	OP203845					18.367333, -94.965000		sem43
Calopterygidae	Hetaerina	sempronia	MEX	H_sem9	OP208186	OP208124	OP222949	x	OP203848					18.592450, -95.083900		sem09
Calopterygidae	Hetaerina	sempronia	MEX	H_semLT1			OP222948		OP203844				Río La Palma, Los Tuxtlas, Veracruz.	18.561774, -95.059153		Hetaerina_sempronia_LT1_Mexico
Calopterygidae	Hetaerina	sempronia	MEX	H_semPa1					OP203843				Zona arqueológica de Palenque, Chiapas	17.481947, -92.048245		Hetaerina_sempronia_Pa1_Mexico
Calopterygidae	Hetaerina	titia	MEX	H_tit05	OP208179	OP208129	OP222824	x	OP203842					18.550101, -95.066714		tit05
Calopterygidae	Hetaerina	titia	NIC	H_tit06		OP208131	OP222826	x	OP203841					10.989456, -84.334467		tit06
Calopterygidae	Hetaerina	titia	USA	H_tit35	OP208181	OP208132	OP222822	x	OP203840				Louisiana	31.075803, -93.488817		tit35
Calopterygidae	Hetaerina	titia	MEX	H_tit46				MK243640	MK238642				Rio Armeria, Mexico	18.95001, -103.93351		tit46; H. titia 5
Calopterygidae	Hetaerina	titia	MEX	H_tit47					MK238641				Rio Armeria, Mexico	18.95001, -103.93351		tit47; H. titia 6
Calopterygidae	Hetaerina	titia	CRI	H_tit64				MK243639	MK238640				Rio Tarcolitos	9.75709, -84.61775		tit64; H. titia 7
Calopterygidae	Hetaerina	titia	MEX	H_tit723	OP208180	OP208130	OP222825	x	OP203839					18.9500175, -103.933516		tit723
Calopterygidae	Hetaerina	titia	MEX	H_titCha1			OP222827						Chamela, Jalisco.	19.527156, -105.071163		Hetaerina_titia_Cha1_Mexico
Calopterygidae	Hetaerina	titia	MEX	H_titPa1					OP203838				Río Chacamax, Palenque, Chiapas.	17.482924, -91.974132		Hetaerina_titia_Pa1_Mexico
Calopterygidae	Hetaerina	titia	MEX	H_titTa1			OP222823						Tanchachín, San Luis Potosí.	21.82753, -99.1501		Hetaerina_titia_Ta1_Mexico
Calopterygidae	Hetaerina	titia	MEX	H_titTi7					OP203837				Ticuiz, Michoacán.	18.673062, -103.676832		Hetaerina_titia_Ti7_Mexico
Calopterygidae	Hetaerina	titia	MEX	H_titTu2					OP203836				Río La Palma, Los Tuxtlas, Veracruz.	18.561774, -95.059153		Hetaerina_titia_Tu2_Mexico
Calopterygidae	Hetaerina	vulnerata	MEX	H_vul03	OP208191	OP208133	OP222940	x	OP203835					19.46679306, -96.95018317		vul03
Calopterygidae	Hetaerina	vulnerata	MEX	H_vul04	OP208192	OP208134	OP222937	x	OP203834					19.46679306, -96.95018317		vul04
Calopterygidae	Hetaerina	vulnerata	USA	H_vul48				MK238670	MK238634				Bonita Creek, AZ	32.91627, -109.49282		vul48
Calopterygidae	Hetaerina	vulnerata	USA	H_vul49				MK243641	MK238633				Cave Creek, AZ	31.86238, -109.243667		vul49
Calopterygidae	Hetaerina	vulnerata	CRI	H_vul50				MK243643	MK238635				Rio Palo Seco, Costa Rica	9.53508, -84.27901		vul50
Calopterygidae	Hetaerina	vulnerata	USA	H_vul66				MK243642	MK238632				Cave Creek, AZ	31.86238, -109.243667		vul66
Calopterygidae	Hetaerina	vulnerata	USA	H_vul813				x	OP203833				Arizona	31.480100, -110.377066		vul813
Calopterygidae	Hetaerina	vulnerata	MEX	H_vulMx1			OP222938									Hetaerina_vulnerata_Mx1
Calopterygidae	Hetaerina	vulnerata	MEX	H_vulQr1					OP203832				Chubeje, Querétaro.			Hetaerina_vulnerata_Qr1_Mexico
Calopterygidae	Hetaerina	vulnerata	MEX	H_vulVe1	OP208190								Coatepec, Veracruz.	19.447961, -74.116914		Hetaerina_vulnerata_Ve1_Mexico
Calopterygidae	Hetaerina	vulnerata	MEX	H_vulYe2	OP208189		OP222939		OP203831				La Yerbabuena, Michoacán.	19.806018, -100.717171		Hetaerina_vulnerata_Ye2_Mexico
Calopterygidae	Hetaerina	westfalli	COL	H_wes		OP208086	OP222862	x	OP203830			E. Realpe	Vichada, Pto Inirida, Caño Vitina			ER140724-1
Calopterygidae	Hetaerina	westfalli	COL	H_wes2		OP208085	OP222863	x	OP203829			E. Realpe	Vichada, Pto Inirida, Caño Vitina			ER140724-2
Calopterygidae	Hetaerina	westfalli	BRA	H_wesBr1	OP208228		OP222860		OP203828				Ribeirao Cascalheira, Mato Grosso.			Hetaerina_westfalli_Br1_Brazil
Calopterygidae	Hetaerina	westfalli	BRA	H_wesBr2	OP208229		OP222861						Ribeirao Cascalheira, Mato Grosso.			Hetaerina_westfalli_Br2_Brazil
Chlorocyphidae	Libellago	semiopaca		L_semio			EU055006.1
Calopterygidae	Mnesarete	aenea	BRA	M_aen3		OP208111	OP222914	x	OP203827		R. W. Garrison	S. Bybee, R. Guillermo-Ferreira, R. A. Clement, S. Smith	Para, Belem, Agropalma	2.521002S 48.855789W	2017-06-14	OD1435
Calopterygidae	Mnesarete	aenea	BRA	M_aen4	OP208207	OP208110	OP222915	x	OP203826		R. W. Garrison	S. Bybee, R. Guillermo-Ferreira, R. A. Clement, S. Smith	Para, Belem, Agropalma	2.605046S 48.738174W	2017-06-15	OD1436
Calopterygidae	Mnesarete	aenea	BRA	M_aen5	OP208206			x	OP203825		R. W. Garrison	S. Bybee, R. Guillermo-Ferreira, R. A. Clement, S. Smith	Para, Belem, Agropalma	2.605046S 48.738174W	2017-06-15	OD1437
Calopterygidae	Mnesarete	aenea	BRA	M_aen6		OP208112		x			R. W. Garrison	S. Bybee, R. Guillermo-Ferreira, R. A. Clement, S. Smith	Para, Belem, Agropalma	2.4853S 48.9315W	2017-06-14	OD1439
Calopterygidae	Mnesarete	astrape	BRA	M_ast3				x					roseina ducke, seg 11, 7546, DCK 09-26105113			OD1408
Calopterygidae	Mnesarete	astrape		M_ast4				x	OP203824							code 354
Calopterygidae	Mnesarete	astrape		M_ast5				x	OP203823							cod.1720
Calopterygidae	Mnesarete	astrape		M_ast6				x	OP203822							cod. 435
Calopterygidae	Matrona	basilaris	JPN	M_basil					LC366197.1				Japan
Calopterygidae	Matrona	basilaris	JPN	M_basil	LC366725.1								Japan
Calopterygidae	Matrona	basilaris		M_basil			EU054990.1
Calopterygidae	Mnesarete	cuprea	GUF	M_cup		OP208107	OP222870	x	OP203821		Donnelly	Donnelly	St-Laurent-du-Maroni, Auberge Voltaire, trib. Sparouine R.	5.0532, -54.0886		OD979
Calopterygidae	Mnesarete	cuprea		M_cup3			OP222869	x	OP203820							cod.337
Calopterygidae	Mnesarete	cuprea		M_cup4		OP208109		x	OP203819							cod.519
Calopterygidae	Mnesarete	cuprea		M_cup5				x	OP203818							cod.405
Calopterygidae	Mnesarete	cuprea	BRA	M_cup6		OP208108	OP222871	x	OP203817		R. W. Garrison	S. Bybee, R. Guillermo-Ferreira, R. A. Clement, S. Smith	Amazonas, Manaus, Rio Preta da Eva	-2.732, -59.450	2017-06-10	OD1433
Calopterygidae	Mnesarete	devillei	ECU	M_dev2					OP203816		K. J. Tennessen	K. J. Tennessen	Napo Province, 11.2km E of Puerto Napo, rd. to Jatun Sacha			OD981
Calopterygidae	Mnesarete	drepane	ECU	M_dre2		OP208102	OP222873	x	OP203815			M. Sanchez Herrera	Loreto, Huaticocha			MSH-MNESA-291
Calopterygidae	Mnesarete	drepane	ECU	M_dre3		OP208106	OP222874	x	OP203814			M. Sanchez Herrera	Loreto, Huaticocha			MSH-MNESA-281
Calopterygidae	Mnesarete	drepane	ECU	M_dre4		OP208103	OP222876	x	OP203813		W. Haber	D. Wagner, R. Vargus, W. Haber, F. Morrison, K. Macsuga	Sucumbios Province, Gravel road from Limoncocha to La Joya, 7.7 km SE of La Joya, tilapia ponds in open orchard with two canalized streams, (waypoint 441) elevation 287	-.355, -76.82	2011-01-18	OD1394
Calopterygidae	Mnesarete	fulgida	COL	M_ful2		OP208101	OP222868		OP203812			M. Sanchez Herrera and E. Realpe	Vaupes, Mitu, Rio Caño Sangre			MIT 133
Calopterygidae	Mnesarete	fulgida	ECU	M_ful4		OP208105	OP222875	x	OP203811		W. Haber	D. Wagner, E. Tapia, J. Miller, V. Wagner	Orellana Province, Rio Shiripuno, vicinity Shiripuno Lodge, 26 km SE of Shiripuno bridge, oxbow lake and vicinity		2009-01-25	OD1393
Calopterygidae	Mnesarete	fuscibasis	BRA	M_fusc			OP222883	x	OP203810		R. Guillermo-Ferreira		Chapada dos Guimarães, a stream named "Tronco"	-15.43897, -55.763346		OD1195
Calopterygidae	Mnesarete	guttifera	BRA	M_gut2			OP222910		OP203809		R. Guillermo-Ferreira		Chapada dos Guimarães, a stream named "Tronco"	-15.43897, -55.763346		OD1196
Calopterygidae	Mnesarete	guttifera	BRA	M_gut4			OP222912	x	OP203900		R. Guillermo-Ferreira		Chapada dos Guimarães, a stream named "Tronco"	-15.43897, -55.763346		OD1419
Calopterygidae	Mnesarete	guttifera	BRA	M_gut6			OP222911	x	OP203899		R. W. Garrison	S. Bybee, R. Guillermo-Ferreira, R. A. Clement, S. Smith	Minas Gerais, Uberlandia	-18.983347, -48.295437	2017-06-18	OD1443
Calopterygidae	Mnesarete	hauxwelli	ECU	M_hau					OP203808		B. Mauffray	B. Mauffray	Pastaza Province, Rio Metolo, Los Copales, between Mera and Shell	-1.491944, -78.072500		OD989
Calopterygidae	Mnesarete	hauxwelli	ECU	M_hau2		OP208104	OP222872	x	OP203807		K. J. Tennessen	K. J. Tennessen	Pastaza Province, Rio Metolo, Los Copales, between Mera and Shell	-1.491944, -78.072500		OD990
Calopterygidae	Mnesarete	hauxwelli	ECU	M_hau3				x	OP203806		W. Haber	R. Vargus, W. Haber, F. Morrison	Pastaza Province, Hwy 45, 38 km SE of Puyo, stream 1-2m, in pasture and forest	-1.742, -77.857	2011-01-27	OD1395
Calopterygidae	Mnesarete	metallica	COL	M_met			OP222877	x	OP203805			M. Sanchez Herrera and E. Realpe	Vaupes, Mitu, Rio Caño Sangre			MIT124
Calopterygidae	Mnesarete	metallica	ECU	M_met2		OP208100	OP222878		OP203804		W. Haber	D. Wagner, J. Ascher, W. Haber, F. Morrison	Orellana Province, small feeder streams of Rio Curiyacu, 8 km SE of Coca on oil pipeline road, on gravel side road to oil drilling platform	-0.499, -76.917	2012-01-26	OD1396
Calopterygidae	Mnesarete	pudica	BRA	M_pud	OP208217	OP208093	OP222879	x	OP203803		S. Smith	S. Smith, R. A. Clement	São Paulo, Assis, Cattle field near Assis	-22.644657, -50.462849	2016-02-08	OD1184
Calopterygidae	Mnesarete	pudica	BRA	M_pud2			OP222882	x	OP203802		S. Smith	S. Smith, R. A. Clement	São Paulo, Assis, Cattle field near Assis	-22.644657, -50.462849	2016-02-08	OD1185
Calopterygidae	Mnesarete	pudica	BRA	M_pud3	OP208215	OP208091	OP222880	x	OP203801		S. Smith	S. Smith, R. A. Clement	São Paulo, Assis, Cattle field near Assis	-22.644657, -50.462849	2016-02-08	OD1186
Calopterygidae	Mnesarete	pudica	BRA	M_pud4	OP208216	OP208092	OP222881	x	OP203800		S. Smith	S. Smith, R. A. Clement	São Paulo, Assis, Cattle field near Assis	-22.644657, -50.462849	2016-02-08	OD1187
Calopterygidae	Mnesarete	pudica	BRA	M_pud6	OP208218	OP208094	OP222884	x	OP203799		S. Smith	S. Smith, R. A. Clement	São Paulo, Assis, Cattle field near Assis	-22.644657, -50.462849	2016-02-08	OD1189
Calopterygidae	Mnesarete	rhopalon	BRA	M_rho			OP222913	x	OP203798		R. Guillermo-Ferreira	R. Guillermo-Ferreira	Costela, Serra da Canastra National Park, Minas Gerais, Brazil	-20.265894, -46.395779	25.v.17	OD1420
Calopterygidae	Mnesarete	williamsoni	BRA	M_wil				x			U. Gaspar Neiss		16.Tijuccaguara, CAX-004 seg 510000461, number 44		231XI112	OD1404
Calopterygidae	Mnesarete	williamsoni	BRA	M_wil2				x	OP203797			A. P. J. Faria	Paragominas, Pará, local: PST 14, seg 6		2015-03-09	OD1407
Calopterygidae	Mnesarete	williamsoni	BRA	M_wil3	OP208222	OP208082	OP222854	x	OP203796		R. W. Garrison	S. Bybee, R. Guillermo-Ferreira, R. A. Clement, S. Smith	Pará, Belem, Agropalma	-2.543239, -48.798426	2017-06-15	OD1434
Calopterygidae	Mnesarete	williamsoni	BRA	M_wil4	OP208224	OP208084	OP222855	x	OP203795		R. W. Garrison	S. Bybee, R. Guillermo-Ferreira, R. A. Clement, S. Smith	Pará, Belem, Agropalma	-2.543239, -48.798426	2017-06-15	OD1438
Calopterygidae	Mnesarete	williamsoni	BRA	M_wil5	OP208225	OP208081		x	OP203794		R. W. Garrison	S. Bybee, R. Guillermo-Ferreira, R. A. Clement, S. Smith	Pará, Belem, Agropalma	-2.543239, -48.798426	2017-06-15	OD1440
Calopterygidae	Mnesarete	williamsoni	BRA	M_wil6	OP208231	OP208083	OP222856	x	OP203793		R. W. Garrison	S. Bybee, R. Guillermo-Ferreira, R. A. Clement, S. Smith	Pará, Belem, Agropalma	-2.543239, -48.798426	2017-06-15	OD1442
Calopterygidae	Neurobasis	ianthinipennis	IDN	N_ianth	KF369460.1								Indonesia: Papua
Calopterygidae	Neurobasis	ianthinipennis		N_ianth			EU054952.1
Calopterygidae	Ormenophlebia	imperatrix	ECU	O_imp			OP222970	x	OP203792		K. J. Tennessen	K. J. Tennessen	Napo Province, 5km S of Baeza, 1900m	-0.476667, -77.870000		OD975
Calopterygidae	Ormenophlebia	imperatrix	COL	O_imp2	OP208204	OP208148	OP222969	x	OP203791			E. Realpe	Parque nacional natural Cueva de los Guácharos			MSH-PNNGUA
Calopterygidae	Ormenophlebia	imperatrix	ECU	O_imp3	OP208205	OP208149	OP222971	x	OP203790		W. Haber	D. Wagner, R. Vargus, W. Haber, F. Morrison, B. Zacharczenko, K. Macsuga	Napo Province, Yanayacu Biological Station, 16 km S of Baeza, 2-3 m wide rocky stream and bordering trail in forest below station, 2045m	-0.599, -77.896	2011-01-13	OD1397
Calopterygidae	Ormenophlebia	saltuum	PER	O_sal	OP208203	OP208150	OP222968	x	OP203934		K. J. Tennessen	K. J. Tennessen	Junin Region, Chanchamayo Province, San Ramon Dist. Quebrada Puente Paloma, parked at coordinates, then walked trail upstream	-11.13761, -75.32681	2015-11-27	OD1398
Platycnemididae	Platycnemis	pennipes	NLD	P_penn					AJ459230.1				Netherlands: Drentsche Aa
Platycnemididae	Platycnemis	pennipes	BEL	P_penn	KF369498.1								Belgium
Platycnemididae	Platycnemis	pennipes		P_penn			EU055010.1
Philogangidae	Philoganga	vetusta		P_vet					AJ746318.1
Philogangidae	Philoganga	vetusta	VNM	P_vet	KF369490.1								Viet Nam: Dac Lac
Philogangidae	Philoganga	vetusta	HHP	P_vet			EU055020.1						Hong Kong:Shingmum
Chlorocyphidae	Rhinocypha	tincta	IDN	R_tincta	KF369536.1								Indonesia: Papua
Chlorocyphidae	Rhinocypha	tincta		R_tincta			EU054949.1
Calopterygidae	Sapho	bicolor	GAB	S_bic					AJ459222.1				Gabon: Haut-Ogooue
Calopterygidae	Sapho	bicolor	CMR	S_bic	AGY95268.1								Cameroon, Mbalmago forest
Chlorocyphidae	Sundacypha	petiolata	MYS	S_pet					AJ746320.1				Sarawak, Malaysia
Chlorocyphidae	Sundacypha	petiolata	THA	S_pet	KF369551.1								Thailand:Pahang Krau
Calopterygidae	Umma	saphirina	UGA	U_saph					AJ459223.1				Uganda, Budongo
Calopterygidae	Vestalis	beryllae	MYS	V_beryl					JQ341027.1				Kinabalu, Borneo
Calopterygidae	Vestalis	beryllae		V_beryl			EU055012.1
