# Supplementary material
Source: MDPI journal article supplement (https://www.mdpi.com/1424-2818/14/9/757)
Supplement: s1 [file s1 › supplementary/TableS3.xlsx]

## Sheet: Sheet1
Primer Name	Sequence	Gene	Direction	Annealing temperature
mtd6_het	GGAGGATTTGGAAACTGATTAGT	COI	F	53,45
deep2r8_het	TAACTCCATAGCACTTTTCTGC	COI	R	53,45
ODO_LCO1490d	TTTCTACWAACCAYAAAGATATTGG	COI	F	53,45
ODO_HCO2198d	TAAACTTCWGGRTGTCCAAARAATCA	COI	R	53,45
12Sai_het	GATCTGATGAAGGTGGATTT	12S	F	53
12Sbi_het	TAGCTCTTCTGAAATCGAGA	12S	R	53
EF1a_f_het	GCYGARCGYGARCGTGGTATYAC	Ef1a	F	55
EF1a_r_het	CATGTTGTCGCCGTGCCAAC	Ef1a	R	55
ITS1Forward_Het	CGTCGAATTGTGAACTGC	ITS	F	53
ITS1Rev_Het	GCAATGTGCGTTCGAAAC	ITS	R	53
