# Supplementary material
Source: MDPI journal article supplement (https://www.mdpi.com/1424-2818/14/9/757)
Supplement: s1 [file s1 › supplementary/TableS4.xlsx]

## Sheet: Corrected_distr
Family	Genus	Species	Country	Locality	GPS	Name in analysis	COIpt1	COIpt2	12S	ef1a	ITS1/ITS2
Calopterygidae	Hetaerina	amazonica	COL	Vaupes, Mitu, Rio Caño Sangre		H_ama5		x	x
Calopterygidae	Hetaerina	americana	USA	Utah, Grand Co., Moab Rotary Park Mill Creek	38.56504, -109.53737	H_am2	x	x	x	x	x
Calopterygidae	Hetaerina	calverti	MEX	Nuevo Recuerdo, Chiapas.	15.90103, -91.99499	H_amNR2	x		x	x	x
Calopterygidae	Hetaerina	auripennis	BRA	Paragominas, Pará.		H_auriBr3	x		x	x	x
Calopterygidae	Hetaerina	aurora	ECU	Pichincha Province, Calacali-Nanegalito Road.	0.024833, -78.643	H_aurEc1	x		x	x	x
Calopterygidae	Hetaerina	caja caja	ECU	Baeza, Hwy 45 km 87	-0.460455, -77.897723	H_caj2		x	x	x	x
Calopterygidae	Hetaerina	capitalis	MEX		21.366739, -104.616733	H_cap802	x	x	x	x	x
Calopterygidae	Hetaerina	charca	BOL	Cochabamba, Route 7 between Cochabamba and Ville Tunari		H_char5	x	x		x	x
Calopterygidae	Hetaerina	cruentata	MEX		19.466793, -96.950183	H_cru33	x	x	x	x	x
Calopterygidae	Hetaerina	curvicauda	BRA	Nova Nazaré, Mato Grosso.		H_curBr2	x		x	x	x
Calopterygidae	Hetaerina	fuscoguttata	CRI	Rio Bonito, Costa Rica	8.70227, −83.21365	H_fus56	x	x	x	MK243638	MK238643
Calopterygidae	Hetaerina	gallardi	GUF	Kaw Mountains, Potawa Lodge	4.543300, -52.151900	H_gal2		x	x	x	x
Calopterygidae	Hetaerina	hebe	BRA	São Paulo, São Carlos, Universidade Federal	-21.931191, -47.8739	H_heb2			x	x	x
Calopterygidae	Hetaerina	indeprensa	BRA	Belterra, Pará.		H_indBr1	x
Calopterygidae	Hetaerina	infecta	MEX	Zona arqueológica de Palenque, Chiapas.	17.4819	H_infCh1					x
Calopterygidae	Hetaerina	laesa Hagen	BRA	Parà, Igarapè Açu		H_lae	x	x	x	x	x
Calopterygidae	Hetaerina	longipes	BRA	São Paulo, São Carlos, Ufscar water canal	-21.981191, -47.873994	H_lon2	x	x	x	x	x
Calopterygidae	Hetaerina	majuscula	CRI	Quebrada Pedegral, Costa Rica	10.92609, -85.47166	H_maj53	x	x	x		MK238638
Calopterygidae	Hetaerina	miniata	NIC		10.989456, -84.334467	H_min36	x	x	x	x	x
Calopterygidae	Hetaerina	moribunda	GUF	St-Laurent-du-Maroni, Moutochi	5.3304, -54.0646	H_mor4				x	x
Calopterygidae	Hetaerina	occisa	MEX		18.358994, -95.000232	H_oc41	x	x	x	x	x
Calopterygidae	Hetaerina	pilula	MEX	Laguna Escondida	18.592, -95.084	H_pil32	x	x	x	x	KM383806
Calopterygidae	Hetaerina	newsp	COL	Boyaca, Arcabuco, Boqueron del Rio Cane		H_pro2			x	x	x
Calopterygidae	Hetaerina	rosea	BRA	Canastra		H_ros7	x	x	x	x	x
Calopterygidae	Hetaerina	rudis	MEX	Arroyo Palo Gordo, Reserva de la Biósfera El Triunfo, Chiapas.	15.739428, -92.918178	H_rudCh1	x		x		x
Calopterygidae	Hetaerina	sanguinea	ECU	Coca, PEER-COCA#5		H_san		x	x	x	x
Calopterygidae	Hetaerina	sempronia	CRI	Prov. Limon, Pocoro, 14 km WSW of Siquirres, Finca de Erick Berlin: Las Brisas	10.070101, -83.630505	H_sem2	x	x	x	x	x
Calopterygidae	Hetaerina	titia	USA	Louisiana	31.075803, -93.488817	H_tit35	x	x	x	x	x
Calopterygidae	Hetaerina	vulnerata	MEX		19.46679306, -96.95018317	H_vul04	x	x	x	x	x
Calopterygidae	Hetaerina	westfalli	COL	Vichada, Pto Inirida, Caño Vitina		H_wes2		x	x	x	x
Calopterygidae	Hetaerina	proxima	BRA	São Paulo, Ubatuba, Pirim Rio	-23.377476, -44.960788	H_pro3			x	x	x
Calopterygidae	Mnesarete	aenea	BRA	Para, Belem, Agropalma	2.605046S 48.738174W	M_aen4	x	x	x	x	x
Calopterygidae	Mnesarete	astrape				M_ast6				x	x
Calopterygidae	Mnesarete	cuprea	BRA	Amazonas, Manaus, Rio Preta da Eva	-2.732, -59.450	M_cup6		x	x	x	x
Calopterygidae	Mnesarete	devillei	ECU	Napo Province, 11.2km E of Puerto Napo, rd. to Jatun Sacha		M_dev2					x
Calopterygidae	Mnesarete	drepane	ECU	Loreto, Huaticocha		M_dre3		x	x	x	x
Calopterygidae	Mnesarete	fulgida	ECU	Orellana Province, Rio Shiripuno, vicinity Shiripuno Lodge, 26 km SE of Shiripuno bridge, oxbow lake and vicinity		M_ful4		x	x	x	x
Calopterygidae	Mnesarete	fuscibasis	BRA	Chapada dos Guimarães, a stream named "Tronco"	-15.43897, -55.763346	M_fusc			x	x	x
Calopterygidae	Mnesarete	guttifera	BRA	Chapada dos Guimarães, a stream named "Tronco"	-15.43897, -55.763346	M_gut4			x	x	x
Calopterygidae	Mnesarete	hauxwelli	ECU	Pastaza Province, Rio Metolo, Los Copales, between Mera and Shell	-1.491944, -78.072500	M_hau2		x	x	x	x
Calopterygidae	Mnesarete	metallica	ECU	Orellana Province, small feeder streams of Rio Curiyacu, 8 km SE of Coca on oil pipeline road, on gravel side road to oil drilling platform	-0.499, -76.917	M_met2		x	x		x
Calopterygidae	Mnesarete	pudica	BRA	São Paulo, Assis, Cattle field near Assis	-22.644657, -50.462849	M_pud	x	x	x	x	x
Calopterygidae	Mnesarete	rhopalon	BRA	Costela, Serra da Canastra National Park, Minas Gerais, Brazil	-20.265894, -46.395779	M_rho			x	x	x
Calopterygidae	Mnesarete	williamsoni	BRA	Pará, Belem, Agropalma	-2.543239, -48.798426	M_wil3	x	x	x	x	x
Calopterygidae	Ormenophlebia	imperatrix	COL	Parque nacional natural Cueva de los Guácharos		O_imp2	x	x	x	x	x
Calopterygidae	Ormenophlebia	saltuum	PER	Junin Region, Chanchamayo Province, San Ramon Dist. Quebrada Puente Paloma, parked at coordinates, then walked trail upstream	-11.13761, -75.32681	O_sal	x	x	x	x	x
