# Supplementary material
Source: MDPI journal article supplement (https://www.mdpi.com/1424-2818/14/9/757)
Supplement: s1 [file s1 › supplementary/TableS5.xlsx]

## Sheet: Sheet2
Scenario	Model	LnL	numparams	d	e	j	AICc	AICc_wt	n
Control	DEC	-226.4	2	0.01	0.01	0	457.1	4.7e-13	46
	DEC+J	-223.4	3	0.0075	1e-12	0.015	453.3	3.1e-12	46
	DIVALIKE	-234.6	2	0.0095	0.0021	0	473.5	1.3e-16	46
	DIVALIKE+J	-233.4	3	0.0088	1e-12	0.0091	473.3	1.4e-16	46
	BAYAREALIKE	-238.8	2	0.01	0.01	0	482	1.9e-18	46
	BAYAREALIKE+J	-196.9	3	0.0027	0.046	0.0028	400.4	1	46
Pliocene	DEC	-204.5	2	0.014	1e-12	0	413.3	7.1e-08	46
	DEC+J	-202.8	3	0.014	1e-12	0.021	412.1	1.2e-07	46
	DIVALIKE	-213.3	2	0.018	0.0078	0	430.8	1.1e-11	46
	DIVALIKE+J	-213	3	0.017	0.0059	0.0097	432.6	4.5e-12	46
	BAYAREALIKE	-191	2	0.0066	0.05	0	386.3	0.051	46
	BAYAREALIKE+J	-186.9	3	0.0058	0.033	0.013	380.4	0.95	46
Miocene	DEC	-208.6	2	0.012	0.006	0	421.5	2.6e-08	46
	DEC+J	-206	3	0.011	1e-12	0.025	418.6	1.1e-07	46
	DIVALIKE	-216.1	2	0.014	0.0026	0	436.5	1.5e-11	46
	DIVALIKE+J	-214.8	3	0.013	1e-12	0.015	436.2	1.7e-11	46
	BAYAREALIKE	-193.1	2	0.0053	0.052	0	390.5	0.14	46
	BAYAREALIKE+J	-190.2	3	0.0048	0.04	0.0071	386.9	0.86	46
