# Supplementary material
Source: MDPI journal article supplement (https://www.mdpi.com/1424-2818/14/9/757)
Supplement: s1 [file s1 › supplementary/TableS6.xlsx]

## Sheet: Sheet1
Family	Genus	Species	Country	Name in analysis	Male, Hindwing, color: hyaline (0), basal coloration (1), entire wing colored (2)	Male, Hindwing, apical color: absent (0), apical melanization only (1), multiple cells colored black or red (2)	Male, Forewing, apical color: absent (0), apical melanization only (1), multiple cells colored black or red (2)	Male, apical color: absent from fore and hind wings (0), present in hind wing (1), present in hind and forewings (2)	Habitat: open grassland/generalist (0), forest specialist (1)	Habitat: open grassland (0), forest (1), both (2)
Calopterygidae	Hetaerina	amazonica	COL	H_ama5	1	2	0	1	1	1
Calopterygidae	Hetaerina	americana	USA	H_am2	1	0	0	0	0	0
Calopterygidae	Hetaerina	calverti	MEX	H_amNR2	1	0	0	0	0	0
Calopterygidae	Hetaerina	auripennis	BRA	H_auriBr3	1	2	2	2	0	0
Calopterygidae	Hetaerina	aurora	ECU	H_aurEc1	1	2	2	2	1	1
Calopterygidae	Hetaerina	caja caja	ECU	H_caj2	1	2	0	1	1	1
Calopterygidae	Hetaerina	capitalis	MEX	H_cap802	1	2	0	1	1	1
Calopterygidae	Hetaerina	charca	BOL	H_char5	1	2	2	2	1	1
Calopterygidae	Hetaerina	cruentata	MEX	H_cru33	1	1	0	1	0	2
Calopterygidae	Hetaerina	curvicauda	BRA	H_curBr2	1	2	0	1	1	1
Calopterygidae	Hetaerina	fuscoguttata	CRI	H_fus56	1	2	2	2	1	1
Calopterygidae	Hetaerina	gallardi	GUF	H_gal2	1	2	2	2	1	1
Calopterygidae	Hetaerina	hebe	BRA	H_heb2	1	2	2	2	?	?
Calopterygidae	Hetaerina	indeprensa	BRA	H_indBr1	1	2	0	1	1	1
Calopterygidae	Hetaerina	infecta	MEX	H_infCh1	1	2	0	1	1	1
Calopterygidae	Hetaerina	laesa Hagen	BRA	H_lae	1	2	0	1	1	1
Calopterygidae	Hetaerina	longipes	BRA	H_lon2	1	2	2	2	?	?
Calopterygidae	Hetaerina	majuscula	CRI	H_maj53	1	2	0	1	1	1
Calopterygidae	Hetaerina	miniata	NIC	H_min36	1	2	0	1	1	1
Calopterygidae	Hetaerina	moribunda	GUF	H_mor4	1	2	0	1	1	1
Calopterygidae	Hetaerina	occisa	MEX	H_oc41	1	2	2	2	0	2
Calopterygidae	Hetaerina	pilula	MEX	H_pil32	1	2	0	1	1	1
Calopterygidae	Hetaerina	newsp	COL	H_pro2	1	0	0	0	0	0
Calopterygidae	Hetaerina	rosea	BRA	H_ros7	1	2	0	1	1	1
Calopterygidae	Hetaerina	rudis	MEX	H_rudCh1	1	2	2	2	1	1
Calopterygidae	Hetaerina	sanguinea	ECU	H_san	1	2	0	1	1	1
Calopterygidae	Hetaerina	sempronia	CRI	H_sem2	1	2	0	1	1	1
Calopterygidae	Hetaerina	titia	USA	H_tit35	2	1	1	2	0	0
Calopterygidae	Hetaerina	vulnerata	MEX	H_vul04	1	1	0	1	0	2
Calopterygidae	Hetaerina	westfalli	COL	H_wes2	1	2	0	1	1	1
Calopterygidae	Hetaerina	proxima	BRA	H_pro3	1	1	1	2	?	?
Calopterygidae	Mnesarete	aenea	BRA	M_aen4	1	2	0	1	1	1
Calopterygidae	Mnesarete	astrape		M_ast6	0	?	?	?	1	1
Calopterygidae	Mnesarete	cuprea	BRA	M_cup6	0	2	0	1	1	1
Calopterygidae	Mnesarete	devillei	ECU	M_dev2	0	2	0	1	1	1
Calopterygidae	Mnesarete	drepane	ECU	M_dre3	0	2	0	1	1	1
Calopterygidae	Mnesarete	fulgida	ECU	M_ful4	0	2	0	1	1	1
Calopterygidae	Mnesarete	fuscibasis	BRA	M_fusc	1	0	0	0	?	?
Calopterygidae	Mnesarete	guttifera	BRA	M_gut4	0	1	0	1	1	1
Calopterygidae	Mnesarete	hauxwelli	ECU	M_hau2	0	2	0	1	1	1
Calopterygidae	Mnesarete	metallica	ECU	M_met2	0	1	0	1	1	1
Calopterygidae	Mnesarete	pudica	BRA	M_pud	2	0	0	0	?	?
Calopterygidae	Mnesarete	rhopalon	BRA	M_rho	0	?	?	?	?	?
Calopterygidae	Mnesarete	williamsoni	BRA	M_wil3	0	2	0	1	1	1
Calopterygidae	Ormenophlebia	imperatrix	COL	O_imp2	0	0	0	0	1	1
Calopterygidae	Ormenophlebia	saltuum	PER	O_sal	0	?	?	?	1	1
Calopterygidae	Calopteryx	splendens	SWE	C_splend	2	0	0	0	0	0
Calopterygidae	Sapho	bicolor	GAB	S_bic	2	2	2	2	1	1
Calopterygidae	Umma	saphirina	UGA	U_saph	0	0	0	0	1	1
Calopterygidae	Vestalis	beryllae	MYS	V_beryl	0	1	2	2	1	1
Calopterygidae	Echo	modesta	MYS	E_modes	0	2	1	2	1	1
Calopterygidae	Matrona	basilaris	JPN	M_basil	2	2	2	2	1	1
Calopterygidae	Neurobasis	ianthinipennis	IDN	N_ianth	2	?	?	?	0	2
Chlorocyphidae	Chlorocypha	curta	CMR	C_curta	0	0	0	0	1	1
Chlorocyphidae	Sundacypha	petiolata	MYS	S_pet	2	2	0	1	0	2
Chlorocyphidae	Libellago	semiopaca		L_semio	0	2	0	1	1	1
Chlorocyphidae	Heliocypha	biseriata		H_biser	2	2	2	2	1	1
Chlorocyphidae	Rhinocypha	tincta	IDN	R_tincta	2	2	2	2	0	0
Philogangidae	Philoganga	vetusta		P_vet	0	0	0	0	1	1
Platycnemididae	Platycnemis	pennipes	NLD	P_penn	0	0	0	0	0	0
Euphaeidae	Euphaea	impar	MYS	E_impar	2	2	0	1	1	1
Calopterygidae	Calopteryx	aequabilis	USA	C_aeq	2	2	2	2	1	1
Calopterygidae	Calopteryx	maculata	USA	C_mac	2	2	2	2	1	1
