# Supplementary material
Source: MDPI journal article supplement (https://www.mdpi.com/1424-2818/14/9/757)

Hetaerina  
Mnesarete  
Ormenophlebia

Male, Hindwing, apical color

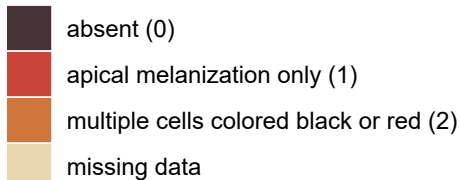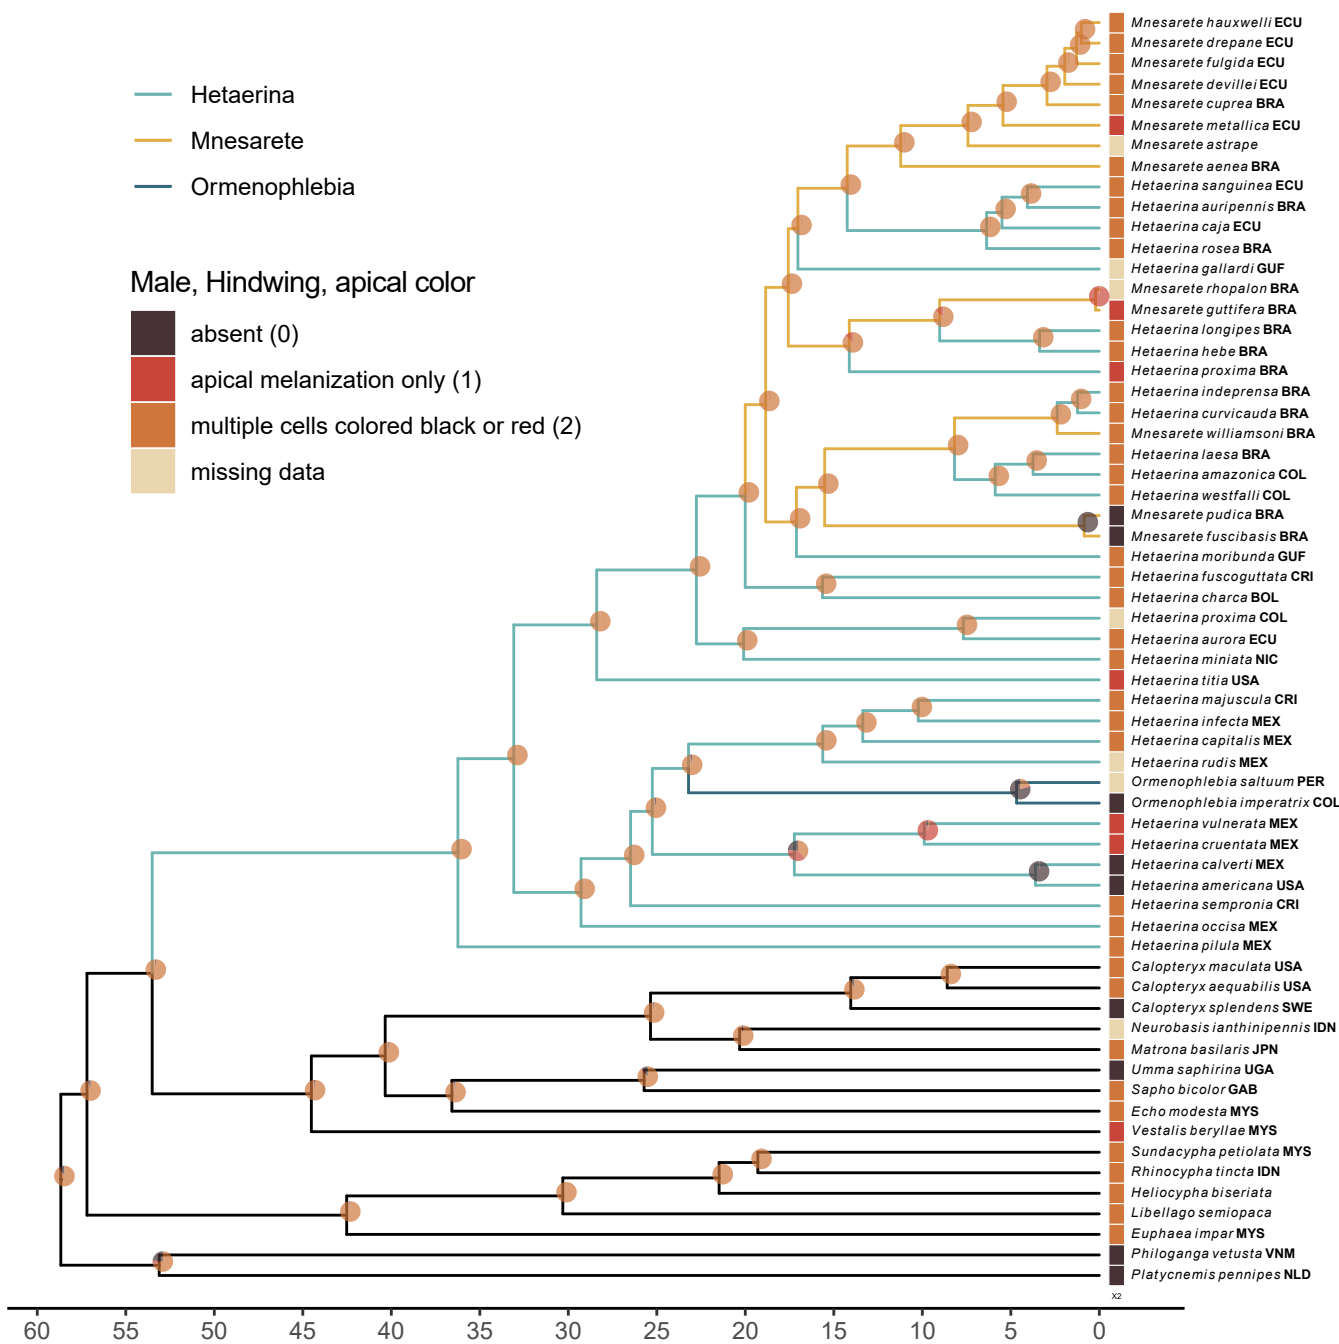

Supplement: s1 [file s1]

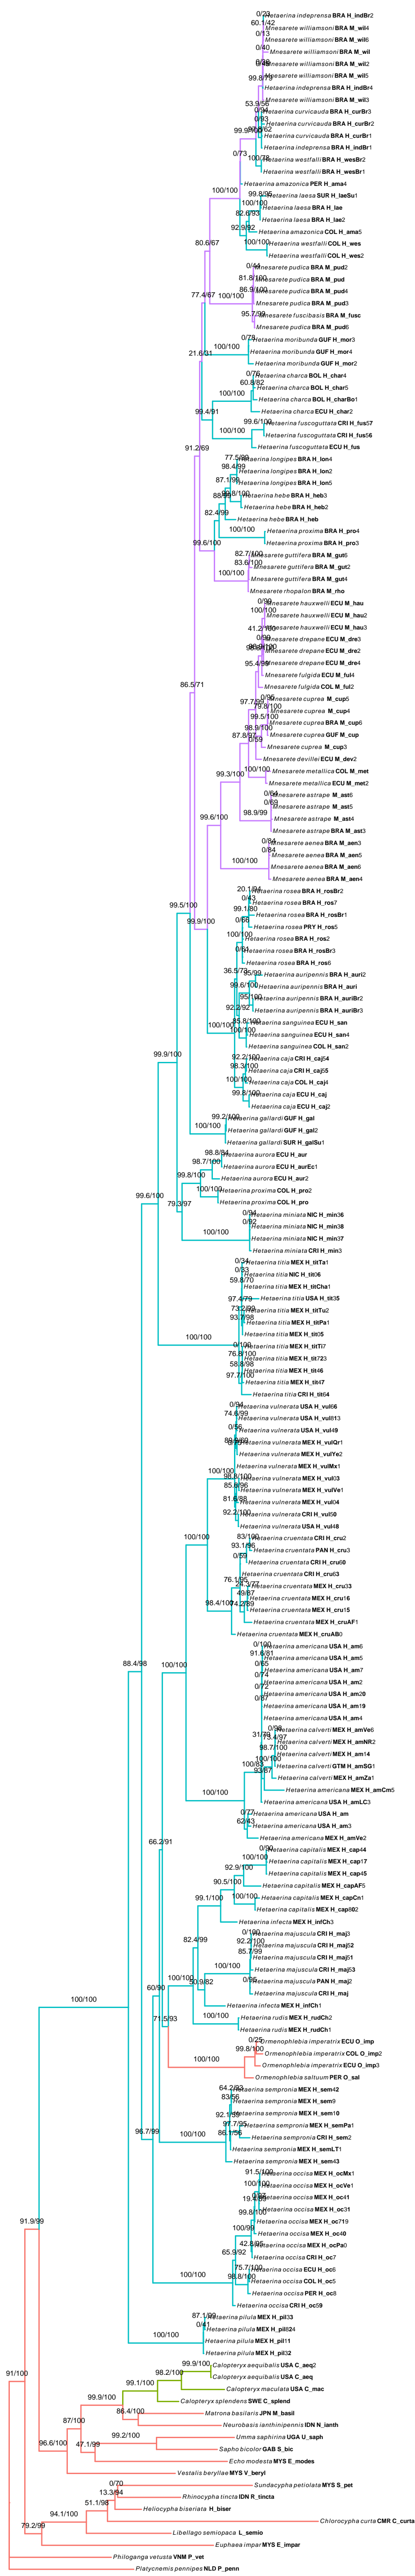

Supplement: s1 [file s1]

group

Hetaerina

Mnesarete

Ormenophlebia

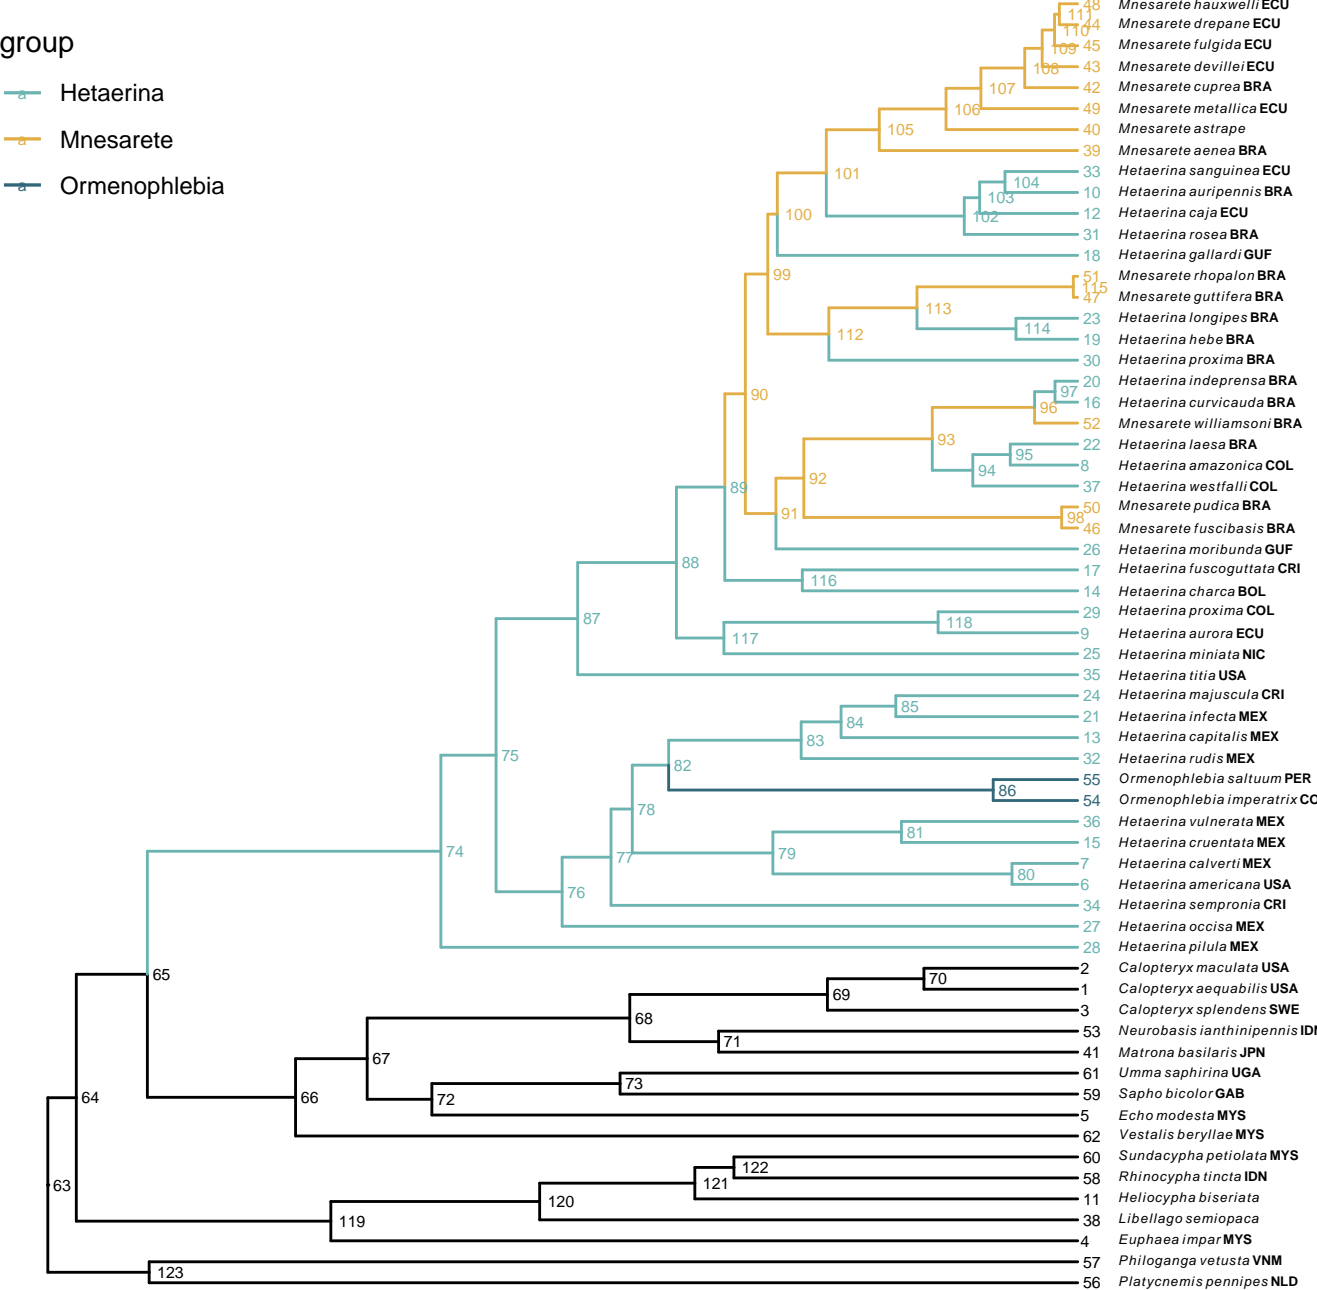

Supplement: s1 [file s1]

Hetaerina  
Mnesarete  
Ormenophlebia

# Male, apical color

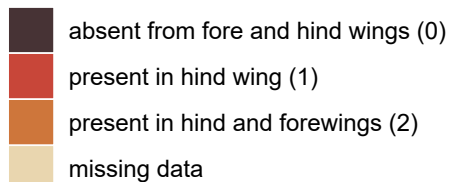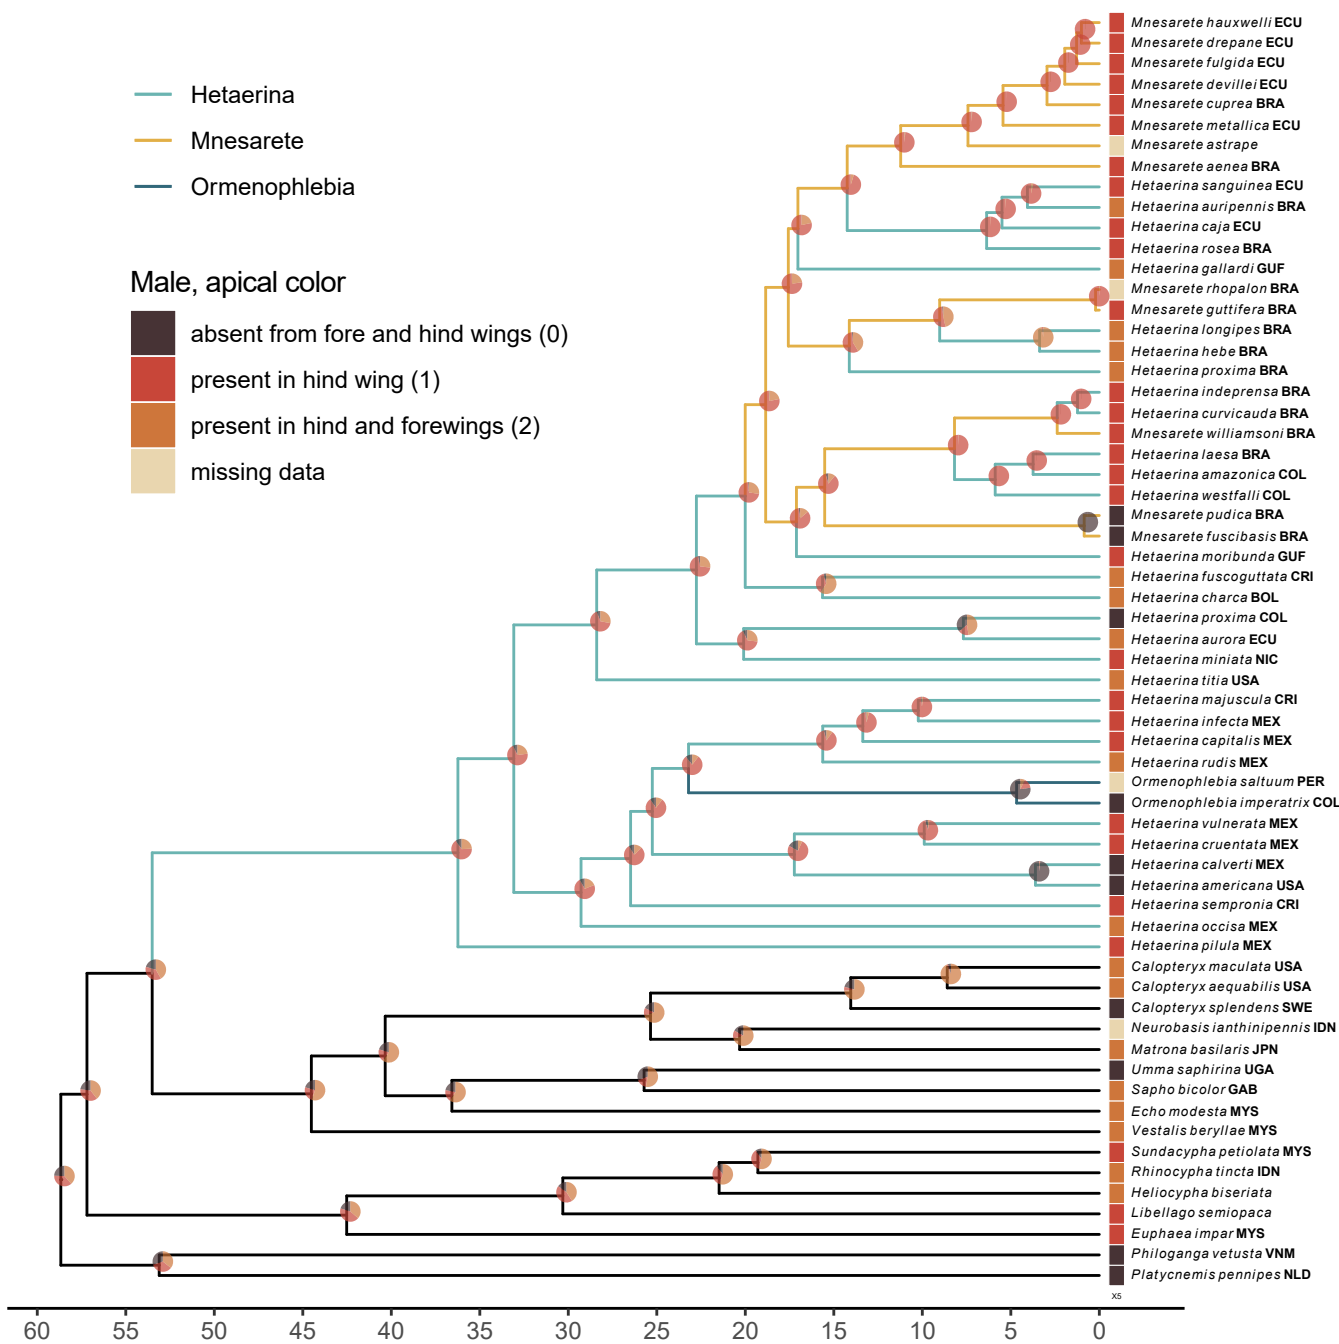

Supplement: s1 [file s1]

— Hetaerina  
— Mnesarete  
— Ormenophlebia

Male, Forewing, apical color:

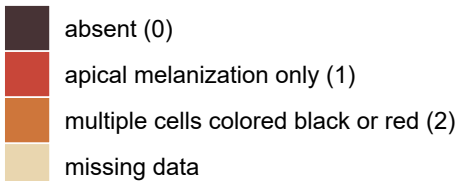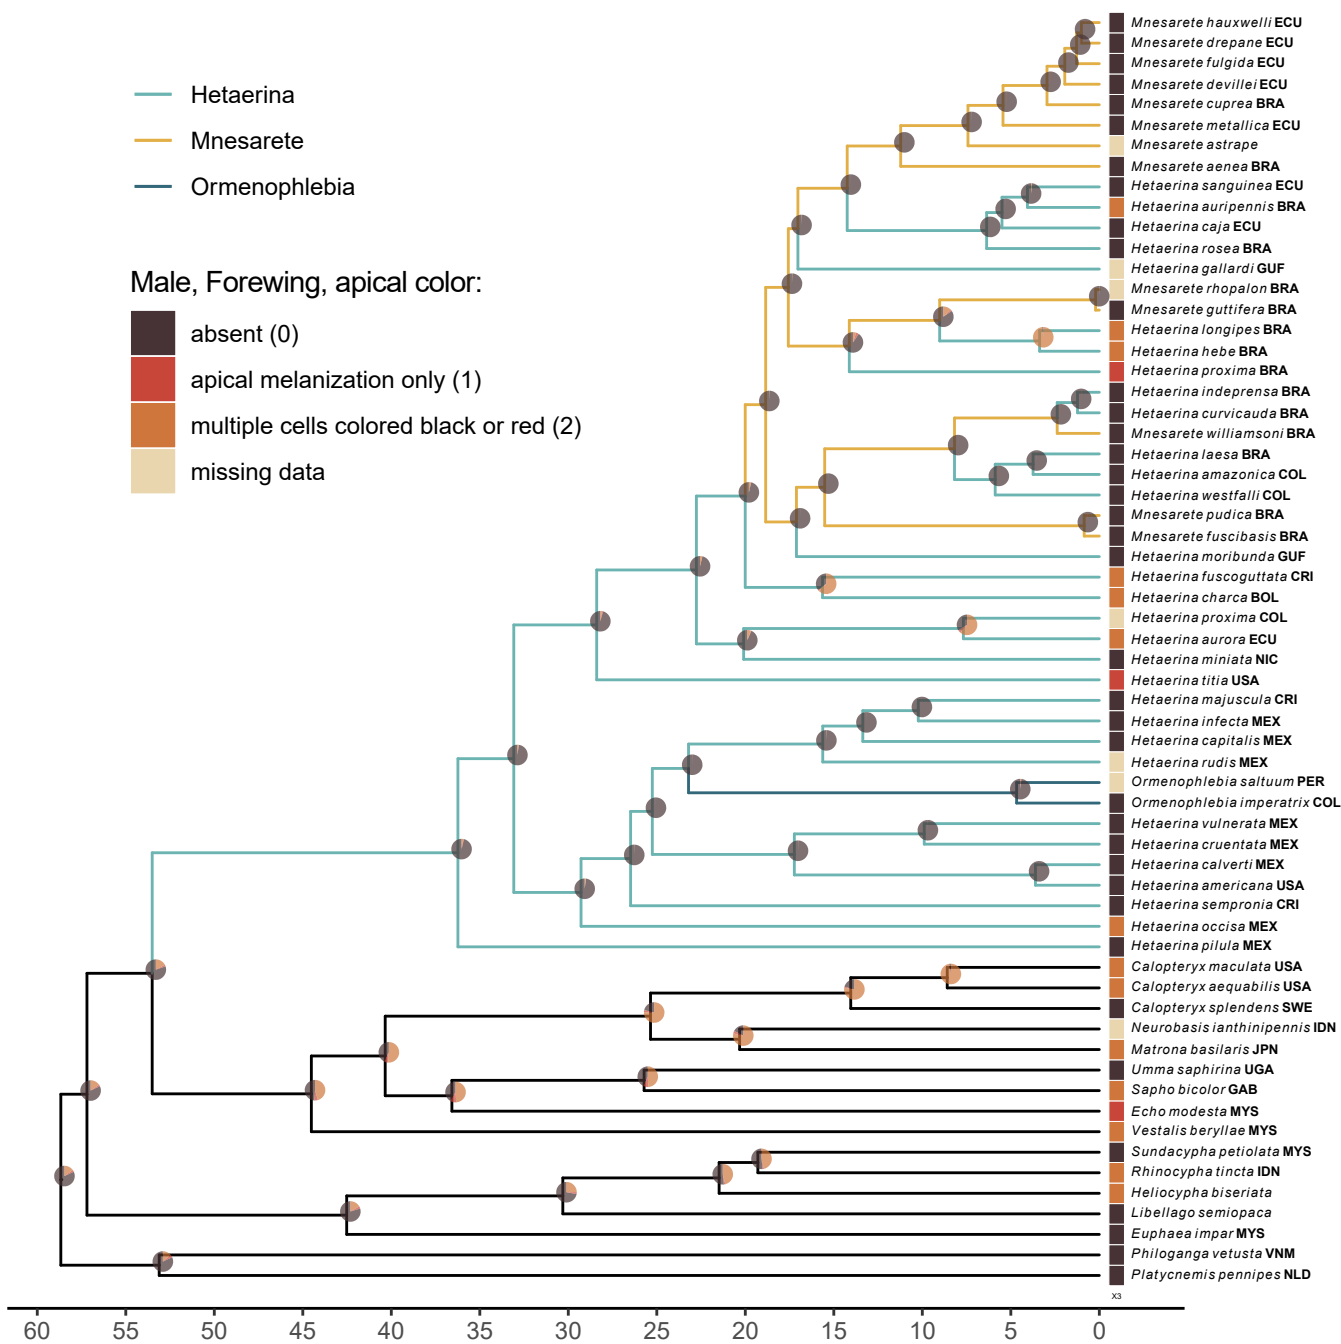

Supplement: s1 [file s1]
